# 1 Reappraisal of Spinach-based RNA Visualization in Plants<sup>1</sup>

2 **Zhiming Yu,<sup>a</sup> Fengling Mei,<sup>a</sup> Haiting Yan,<sup>a</sup> Qiyuan Chen,<sup>a</sup> Mengqin Yao,<sup>a</sup> Shuyue**  
3 **Liu,<sup>a</sup> Yue Wang,<sup>a</sup> Xian Zhang,<sup>a</sup> Pengcheng Zhang,<sup>a</sup> Stephen Jackson,<sup>b</sup> Nongnong**  
4 **Shi,<sup>a</sup> Yule Liu,<sup>c</sup> Yiguo Hong,<sup>a,b,d,2</sup>**

5 <sup>a</sup> Research Centre for Plant RNA Signaling and Zhejiang Provincial Key Laboratory for  
6 Genetic Improvement and Quality Control of Medicinal Plants, College of Life and  
7 Environmental Sciences, Hangzhou Normal University, Hangzhou 311121, China.

8 <sup>b</sup> School of Life Sciences, University of Warwick, Coventry CV4 7AL, UK

9 <sup>c</sup> MOE Key Laboratory of Bioinformatics, Center for Plant Biology, Tsinghua-Peking  
10 Joint Center for Life Sciences, School of Life Sciences, Tsinghua University, Beijing  
11 100084, China.

12 <sup>d</sup> School of Science and the Environment, University of Worcester, Worcester WR2 6AJ,  
13 UK

14 **<sup>1</sup> Funding:** This work was in part supported by grants from Ministry of Agriculture of the  
15 People's Republic of China (National Transgenic Program of China 2016ZX08009001-  
16 004); National Natural Science Foundation of China (31200913, 31872636); Zhejiang  
17 Provincial Natural Science Foundation (LY19C020002), China Scholarship Council  
18 (201709645003), the Entrepreneurship and Innovation Project for the Overseas  
19 Returnees (or Teams) in Hangzhou (4105C5062000611). Ministry of Science &  
20 Technology of China (National Key R&D Program 2017YFE0110900); Hangzhou  
21 Normal University (Sino-EU Plant RNA Signaling S&T Platform Initiative  
22 9995C5021841101).

23 <sup>2</sup> Address correspondence to [yiguo.hong@hznu.edu.cn](mailto:yiguo.hong@hznu.edu.cn), [yiguo.hong@warwick.ac.uk](mailto:yiguo.hong@warwick.ac.uk),  
24 [y.hong@worc.ac.uk](mailto:y.hong@worc.ac.uk)

25 The author responsible for distribution of materials integral to the findings presented in  
26 this article in accordance with the policy described in the instructions for Authors  
27 ([www.plantphysiol.org](http://www.plantphysiol.org)) is: Yiguo Hong ([yiguo.hong@hznu.edu.cn](mailto:yiguo.hong@hznu.edu.cn),  
28 [yiguo.hong@warwick.ac.uk](mailto:yiguo.hong@warwick.ac.uk), and [y.hong@worc.ac.uk](mailto:y.hong@worc.ac.uk)).

29 **Author Contributions:** Z.Y. designed, performed all experiments, analyzed data and  
30 drafted the manuscript; F.M. H.Y. and Q.C. performed plant transformation, plant RNA  
31 extraction and RT-PCR analysis. M.Y., S.L., Y.W., X.Z., and P.Z. performed virus-based  
32 RMG assays; S.J., N.S., and Y.L. were involved in the analysis of data and helped write  
33 the article; Y.H. initiated the project, conceived experiments, analyzed data, and wrote  
34 the article.

35 **Competing interests:** The authors declare no competing interests.

36 **One sentence summary:** Spinach-based RMG technology was reevaluated to have  
37 potential for ex vivo and in vivo monitoring RNAs in plant cells.

38 **ABSTRACT:** RNAs can be imaged in living cells using molecular beacons, RNA-  
39 binding labeled proteins and RNA aptamer-based approaches. However, Spinach RNA-  
40 mimicking GFP (RMG) has not been successfully used to monitor cellular RNAs in  
41 plants. In this study, we re-evaluated Spinach-based RNA visualization in different  
42 plants via transient, transgenic, and virus-based expression strategies. We found that  
43 like bacterial, yeast and human cellular tRNAs, plant tRNAs such as tRNA<sup>Lys</sup> (K) can  
44 protect and/or stabilize the spinach RNA aptamer interaction with the fluorophore  
45 DFHBI enabling detectable levels of green fluorescence to be emitted. The tRNA<sup>Lys</sup>-  
46 spinach-tRNA<sup>Lys</sup> (KSK), once delivered into “chloroplast-free” onion epidermal cells can  
47 emit strong green fluorescence in the presence of DFHBI. Transgenic or virus-based  
48 expression of monomer KSK, in either stably transformed or virus-infected *Nicotiana*  
49 *benthamiana* plants, failed to show RMG fluorescence. However, incorporating tandem  
50 repeats of KSK into recombinant viral RNAs, enabled qualitative and quantitative  
51 detection, both in vitro and ex vivo (ex planta), of KSK-specific green fluorescence,  
52 though RMG was less obvious in vivo (in planta). These findings demonstrate Spinach-  
53 based RNA visualization has the potential for ex vivo and in vivo monitoring RNAs in  
54 plant cells.

55 **Key words:** *Spinach*; RNA fluorescence; onion; rice, *Nicotiana benthamiana*,  
56 protoplasts, transgenic expression, virus-based RNA delivery

## 57 INTRODUCTION

58 RNAs primarily act as messengers to convey genetic information from DNA to protein.  
59 However, the functionalities of RNAs are much broader. Increased evidence has  
60 demonstrated that RNAs can be potent regulators modulating gene expression at  
61 transcriptional, post-transcriptional and translational levels (Shi et al., 2008; Zhang et  
62 al., 2019). In plants, cellular mRNAs, small interfering RNA (siRNA), microRNAs, and  
63 pathogenic viral and viroid RNAs, can move from cell to cell through plasmodesmata  
64 and spread to distal tissues via the phloem superhighway (Carrington et al., 1996;  
65 Xoconostle-Cázares et al., 1999; Yoo et al., 2004; Buhtz et al., 2008; Deeken et al.,

66 2008; Uddin and Kim, 2013; Chen et al., 2018; Shahid et al., 2018). Some of these  
67 mobile RNAs function as intra- and intercellular as well as systemic signals to control  
68 plant defense, growth and development (Jackson and Hong, 2012; Liu and Chen, 2018;  
69 Zhang et al., 2019). For instance, mobile *Gibberellic acid insensitive* mRNA regulates  
70 leaf morphology in *Arabidopsis*, tomato and pumpkin (Haywood et al., 2005). Systemic  
71 trafficking of *CmNACP* affects shoot and root apical meristem maintenance in pumpkin  
72 (Ruiz-Medrano et al., 1999). *BEL5* mRNA moves from leaf to stolon tip to promote tuber  
73 formation and development in potato (Banerjee et al., 2006). Transportable *AtFT* (Li et  
74 al., 2009; Li et al., 2011; Lu et al., 2012; Luo et al., 2018; Ellison et al., 2020), *FVE*  
75 (Yang and Yu, 2010), *AGL24* (Yang and Yu, 2010) and *ATC* (Huang et al., 2012)  
76 mRNAs regulate flowering in *Arabidopsis*. Furthermore, many RNAs are also able to  
77 move across hetero-graft scions between different plants (Notaguchi et al., 2015) and  
78 ecotypes (Thieme et al., 2015), between parasitic plant and its hosts in a bidirectional  
79 manner, or even between plants and fungi (Kim et al., 2014; Uddin and Kim, 2013).  
80 Thus, mobile RNAs have enormous potentials in regulating plant growth and  
81 development and in response to biotic or abiotic stresses and (Jackson and Hong,  
82 2012; Thieme et al., 2015; Liu and Chen 2018; Zhang et al., 2019). These emerging  
83 frontiers in RNA physiology demand the development of novel technologies to visualize  
84 RNAs in plants.

85 RNAs can be imaged in living cells using molecular beacons (MBs), RNA-binding  
86 labeled proteins (RBLPs) and RNA aptamer-based approaches (Tutucci et al., 2018).  
87 MBs involve a specific probe that perfectly complements with the target RNA in  
88 homogeneous solutions (Tyagi et al., 1996). RBLPs, such as MS2 (Bertrand et al.,  
89 1998), PUM-HD (Wang et al., 2002; Yamada et al., 2011; Filipovska et al., 2012;  
90 Yoshimura et al., 2012), hnRNPA1 (Scheiba et al., 2014),  $\lambda$ N22 (Schönberger et al.,  
91 2012), Cas9 (Nelles et al., 2016) and Cas13a (Abudayyeh et al., 2017), bind to a  
92 specific sequence for detection. Unlike MB- or RBLP-based RNA assays, RNA aptamer  
93 Spinach (known as 24-2 or 24-2min), and its derivative Spinach2 mimic the Green

94 Fluorescent Protein (GFP) when visualizing targeted RNAs (Paige et al., 2011; Strack et  
95 al., 2013; You and Jaffrey, 2015). These RNA aptamers bind to the fluorophore DFHBI  
96 (3,5-difluoro-4-hydroxybenzylidene imidazolinone) and form an intramolecular G-  
97 quadruplex to emit green fluorescence (Warner et al., 2014; Huang et al., 2014). This  
98 technology has been successfully used to directly monitor RNAs in bacterium (Paige et  
99 al., 2011; Pothoulakis et al., 2014; Zhang et al., 2015), yeast (Guet et al., 2015), and  
100 human cells (Paige et al., 2011); and to quantify cellular microRNAs (Huang et al.,  
101 2017). More recently, a similar fluorescent RNA aptamer dubbed Pepper has also been  
102 developed to image RNA in mammalian cells through its binding to the fluorophore ((4-  
103 ((2-hydroxyethyl)(methyl)amino)-benzylidene)-cyanophenylacetonitrile) (Chen et al.,  
104 2019). However, use of fluorescent RNA aptamer-based RNA visualization has had little  
105 success in plants (Huang et al., 2012; 2017; Bai et al., 2020) although such techniques  
106 have attracted a great deal of attention from plant scientists (Ehrhardt and Frommer,  
107 2012). In this study, we reevaluated the usefulness of 'RNA-mimicking-GFP' to monitor  
108 Spinach and Spinach-tagged RNAs via transient and transgenic expression, as well as  
109 virus-based delivery of recombinant RNAs, in different plant cells and tissues.

## 110 RESULTS

### 111 *In vitro* Spinach fluorescence

112 Prior to delivery of the Spinach RNA aptamer, or Spinach-tagged RNAs into plant cells  
113 and tissues, we tested if flanking a plant tRNA at both 5' and 3'-ends of the Spinach  
114 RNA aptamer (Paige et al., 2011) would affect its binding to DFHBI and emission of  
115 green fluorescence (Fig. 1). We cloned the *Arabidopsis thaliana* lysine-tRNA (tRNA<sup>Lys</sup>)  
116 and Spinach (24-2min) (Paige et al., 2011) in the format of *AttRNA<sup>Lys</sup>-AttRNA<sup>Lys</sup>* (KK) or  
117 *AttRNA<sup>Lys</sup>-Spinach(24-2min)-AttRNA<sup>Lys</sup>* (KSK) into the pMD-19/T vector to generate  
118 pMD19-T/KK and pMD19-T/KSK constructs, respectively (Fig. 1A; Supplemental Data  
119 Set S1). The KK and KSK RNA transcription is driven by the T7 promoter in the two  
120 expression vectors. KK and KSK RNAs produced by *in vitro* transcription were readily  
121 detectable by agarose gel electrophoresis (Fig. 1B). Once mixed with DFHBI, only KSK  
122 RNA produced strong GFP-like green fluorescence (Fig. 1C-I). These data indicate that  
123 plant tRNA, similar to its bacterial, yeast or human counterpart (Paige et al., 2011;

124 [Pothoulakis et al., 2014](#); [Guet et al., 2015](#); [Zhang et al., 2015](#)), can protect Spinach to  
125 enable GFP fluorescence *in vitro*.

## 126 **Spinach-based RMG in onion epidermal cells and rice protoplasts**

127 To transiently express Spinach in plant cells, we subcloned *KK* and *KSK* ([Fig. 1A](#);  
128 [Supplemental Data Set S1](#)) into pEAQ-HT, a binary vector for efficient gene expression  
129 ([Sainsbury and Lomonossoff, 2008](#); [Sainsbury et al., 2009](#)), and produced pEAQ-HT/*KK*  
130 and pEAQ-HT/*KSK* ([Fig. 2A](#)). Onion epidermal cells without chloroplasts were then  
131 bombarded with purified plasmid DNA of pEAQ-HT/*KK* or pEAQ-HT/*KSK*. We also  
132 bombarded onion tissues with pEAQ-HT/GFP ([Sainsbury and Lomonossoff, 2008](#)) to  
133 express GFP as positive control. GFP fluorescence was readily visible under the  
134 confocal microscope in onion epidermal cells 10-hr after bombardment ([Fig. 2B and C](#)).  
135 In striking contrast to *KK* control ([Fig. 2D and E](#)), strong green fluorescence was  
136 observed in onion epidermal cells that transiently expressed the *KSK* RNA in the  
137 presence of DFHBI ([Fig. 2F and G](#); [Supplemental Fig. S1](#)). However, rice protoplasts  
138 (isolated from rice etiolated seedlings) expressing *KSK* or *KK* RNA under the control of  
139 the strong *OsU6* promoter ([Feng et al., 2013](#); [Ma et al., 2015](#)) appeared to have a  
140 similar level of green fluorescence in both cases ([Supplemental Fig. S2A-D](#)).

## 141 **Transgenic expression of Spinach in *Nicotiana benthamiana***

142 To obtain stable Spinach expression, we transformed *N. benthamiana* with pEAQ-  
143 HT/*KK* and pEAQ-HT/*KSK* and generated two independent transgenic lines with a  
144 single copy of a transgene for constitutive expression of *KK* or *KSK* RNA ([Fig. 3](#)). The  
145 insertion of the *KK* and *KSK* transgenes in the *N. benthamiana* genome was readily  
146 detected by genomic PCR ([Fig. 3A](#)). Moreover, RT-PCR assays revealed that *KK* and  
147 *KSK* RNAs were being expressed in *KK* and *KSK* transgenic plants, respectively ([Fig.](#)  
148 [3B](#)). However, the level of green fluorescence seen in total RNAs extracted from *KK*  
149 and *KSK* RNA-expressing transgenic plant leaf tissues in the presence of the DFHBI  
150 fluorophore were of similar intensity ([Fig. 3C and D](#); [Supplemental Fig. S3](#); [S4 and S5](#)).  
151 Direct visualization of the cryo-sectioned leaf tissues or protoplasts derived from the *KK*  
152 and *KSK* transgenic plants also showed no noticeable difference in green fluorescence  
153 with or without DFHBI ([Fig. 3E-H](#)). These results indicate that stable expression of *KSK*

154 RNA from a single locus in transgenic plants was insufficient for *in vivo* monitoring of  
155 cellular spinach RNAs in plants.

## 156 **Delivery of Spinach to plants via virus expression systems**

157 The failure of stable expression of KSK RNA to distinguish fluorescent cells and tissues  
158 may be due to the low level of the KSK RNA produced from a single copy of the  
159 transgene in the transgenic plants. To overcome this potential issue, we opted to try  
160 plant virus-based expression systems as these often produce high amount of RNAs  
161 (and proteins) from recombinant viral RNA or DNA genomes during virus infection of  
162 plants (Qin et al., 2015; Qin et al., 2017; Lai et al., 2020). We cloned *KK* and *KSK* into a  
163 Potato virus X (PVX)-based vector (van Wezel et al., 2001) and produced PVX/*KK* and  
164 PVX/*KSK* (Fig. 4A; Supplemental Data Set S1). Three additional constructs  
165 PVX/*AtFT*:*KSK*, PVX/*mAtFT*:*KSK* and PVX/*AtTFL1*:*KSK* were also included in this  
166 study (Fig. 4A). These constructs were expected to express wild-type and mutant  
167 Arabidopsis *Flowering Locus T* (*AtFT* and *mAtFT*; Li et al., 2009; Li et al., 2011; Lu et  
168 al., 2012; Ellison et al., 2020) mobile RNA or the Arabidopsis *Terminal Flowering 1*  
169 (*AtTFL1*; Lu et al., 2012) immobile RNA, all tagged with the KSK aptamer.

170 Recombinant PVX RNAs were sufficiently generated by *in vitro* transcription (Fig.  
171 4B). Indeed, these viral recombinant RNAs with the KSK RNA tag (PVX-*KSK*, PVX-  
172 (m)*AtFT*-*KSK* or PVX-*AtTFL1*-*KSK* RNA) emitted stronger green fluorescence than the  
173 PVX-*KK* RNA (Fig. 4C). However, the fluorescent intensity was much weaker than free  
174 *KSK* RNA (Fig. 1). These results suggest that embedding *KSK* in the PVX genome (of  
175 approximately 6.5 kilobases in size) may attenuate the capacity of *KSK* RNA binding to  
176 DFHBI for emitting green fluorescence. Nevertheless, we infected wild-type *N.*  
177 *benthamiana* plants with each of the recombinant PVXs or PVX/*GFP* (Fig. 4A).  
178 Systemic young leaf tissues with chlorosis systems, characteristic of PVX infection,  
179 were cryo-sectioned and immersed with a DFHBI solution. We observed green  
180 fluorescence in tissues infected with PVX/*KSK*, PVX/*AtFT*:*KSK*, PVX/*mAtFT*:*KSK*,  
181 PVX/*AtTFL1*:*KSK*; however, the fluorescence was much weaker than that observed in  
182 tissues infected with PVX/*GFP*, and often indistinguishable from PVX/*KK* infected  
183 samples (Fig. 4D-J). A similar result was also obtained using a geminivirus (DNA virus)-

184 based expression vector ([Supplemental Fig. S6](#); [Tang et al., 2010](#)). Taken together, our  
185 results indicate that, as with stable transgenic expression, a monomer of KSK RNA  
186 delivered from two highly efficient virus expression vectors was inadequate to visualize  
187 RNAs in plant cells and tissues.

### 188 **Direct and indirect assays of RNAs tagged with tandem repeats of Spinach**

189 The fluorescent signal emitted from a monomer of Spinach from both transgenic and  
190 viral transient expression systems was too weak to be differentiated from background  
191 noise fluorescence in plants. To enhance the “signal vs noise” ratio, we cloned a  
192 tandem repeat of 2 to 5 spinach aptamers into the PVX vector, as described in a recent  
193 report ([Zhang et al., 2015](#)), and generated PVX/KSK\*2, PVX/KSK\*3, PVX/KSK\*4 and  
194 PVX/KSK\*5 ([Fig. 5A](#)). We also renamed PVX/KSK ([Fig. 4A](#)) as PVX/KSK\*1 hereafter.  
195 Indeed, recombinant viral RNA PVX-KSK\*1, PVX-KSK\*2, PVX-KSK\*3, PVX-KSK\*4 and  
196 PVX-KSK\*5 showed an increasing capacity to emit green fluorescence in the presence  
197 of DFHBI ([Fig. 5B-F](#)). We also noticed that PVX-KK RNA-DFHBI mixed solution  
198 possessed some background fluorescence ([Fig. 5F](#)). Using the equation drawn from the  
199 FITC vs fluorescent intensity standard curve ([Supplemental Fig. S4A-C](#) and  
200 [Supplemental Fig. S5](#)), the concentration equivalent to FITC was calculated to be  
201 0.0474  $\mu\text{M}$  for in vitro KSK\*5 RNA transcripts after deducting the background of the KK  
202 DFHBI fluorescence ([Fig. 5F](#)).

203 We then inoculated young leaves of wild-type *N. benthamiana* with recombinant  
204 viral RNA PVX-KK, PVX-KSK\*1, PVX-KSK\*2, PVX-KSK\*3, PVX-KSK\*4 or PVX-KSK\*5.  
205 These plants became systemically infected and developed clear chlorosis on newly  
206 growing young leaves at 7 days post-inoculation (DPI) and onwards ([Supplemental Fig.](#)  
207 [S7A-F](#)). At 17 DPI, total RNA was extracted from young leaf tissues and mixed with  
208 DFHBI. We observed stronger ex vivo fluorescence from RNA extracted from tissues  
209 infected with PVX/KSK\*5 than PVX/KK ([Fig. 6A-F](#)). The relative increase in fluorescent  
210 intensity of total RNA isolated from plants infected with PVX/KSK\*1, PVX/KSK\*2,  
211 PVX/KSK\*3, PVX/KSK\*4 and PVX/KSK\*5 was very similar to that observed for *in vitro*  
212 produced RNA transcripts from these constructs ([Fig. 5C](#); [Fig. 6A-F](#)). Similarly, we also  
213 detected some background ex vivo fluorescence from total RNA extracted from



214 PVX/KK-infected leaf tissues (Fig. 6F). Upon calculation using the equation based on  
215 the FITC vs fluorescent intensity standard curve (Supplemental Fig. S4A-C and  
216 Supplemental Fig. S5), the concentration equivalent to FITC was 0.0221  $\mu\text{M}$  for total  
217 RNAs extracted from PVX/KSK\*5-infected leaf tissues after deducting the background  
218 KK DFHBI fluorescence (Fig. 6F). Despite the positive observations of ex vivo RMG,  
219 RNA fluorescence in cryo-sections of young leaves infected with PVX/KK (Fig. 6G) or  
220 PVX/KSK\*5 (Fig. 6H) was not sufficiently different.

## 221 DISCUSSION

222 Direct visualization of RNA has attracted a great deal of interest in plant science,  
223 particularly in RNA metabolism and mobile RNA signaling. Unfortunately, the successful  
224 establishment of Spinach RNA-mimicking GFP in prokaryotic and eukaryotic cells some  
225 ten years ago (Paige et al., 2011) has not led to establish a similar technology in plants.  
226 The only attempt to use the Spinach aptamer to monitor plant cellular RNAs was  
227 unsuccessful (Huang et al., 2017). In this study, we re-evaluated the use of Spinach-  
228 based RNA visualization in plants via a range of different expression strategies. Our  
229 pump-priming work showed this technology could be used for ex vivo and in vivo  
230 monitoring of RNAs in onion and *N. benthamiana*.

231 We showed that, similar to bacterial, yeast and human cellular tRNAs, plant tRNAs  
232 such as tRNA<sup>Lys</sup> can protect and/or stabilize spinach RNA aptamer enabling interaction  
233 with the DFHBI fluorophore and emission of sufficient green fluorescence for in vitro  
234 detection (Fig. 1). We also observed that tagging spinach RNA to longer RNAs such as  
235 the PVX genomic RNA could lead to attenuation of the spinach fluorescence signal (Fig.  
236 3)

237 We also showed that, tRNA<sup>Lys</sup>-spinach-tRNA<sup>Lys</sup> (KSK), once delivered into  
238 “chloroplast-free” onion epidermal cells via bombardment, can emit detectable green  
239 fluorescence in the presence of DFHBI (Fig. 2; Supplemental Fig. S1). However, in rice  
240 protoplasts (single cells) isolated from green-yellowing stem/leaf tissues, KSK-emitted  
241 fluorescence became less distinguishable from the KK control (Supplemental Fig. S2).  
242 This may be due to the background noise green fluorescence resulted from

243 chromoplasts in rice protoplasts which were isolated from the etiolated stem tissues.  
244 Nevertheless, contrary to the previous report ([Huang et al., 2017](#)), our work clearly  
245 demonstrates that the spinach based RMG can work in plants, at least in onion  
246 epidermal cells.

247 Transgenic expression in stably transformed *N. benthamiana* or virus-based  
248 transient expression of monomer KSK in wild-type *N. benthamiana* plants, failed to  
249 generate clear evidence that KSK-DFHBI could emit distinguishable green fluorescence  
250 when compared to negative KK controls ([Fig. 3](#); [Fig. 4](#); [Supplemental Fig. S3 and](#)  
251 [Supplemental Fig. S6](#)). This was likely due to a high background fluorescence masking  
252 the genuine fluorescent signal emitted from KSK-DFHBI. The background fluorescence  
253 might come from either auto-fluorescence of cellular components such as chloroplasts  
254 and chromoplasts (as seen with the rice protoplasts ([Supplemental Fig. S2](#))), or from  
255 DFHBI non-specific binding to cellular RNAs. The latter was indeed evidenced by our  
256 serendipitous finding that DFHBI could directly and specifically stain RNA, but not DNA  
257 in agarose gels; showing strong fluorescence under long-wavelength UV light  
258 ([Supplemental Fig. S8](#)). This result is also consistent with the original discovery in which  
259 the Spinach-specific fluorescence was often observed after the background noise  
260 fluorescence of negative controls was subtracted ([Paige et al., 2011](#)).

261 We developed the system further by incorporating tandem repeats of spinach RNA  
262 into recombinant PVX RNAs, and by doing this we were able to detect in vitro and ex  
263 vivo (ex planta) KSK-specific green fluorescence although in vivo (in planta) RMG was  
264 less apparent ([Fig. 5](#) and [Fig. 6](#)).

265 In summary, we report that the Spinach RNA aptamer can mimic GFP in plant cells.  
266 However, this technology requires further improvement to realize its full potential in  
267 plant RNA visualization. The main challenge is to reduce the background fluorescence  
268 whilst enhancing KSK-specific green fluorescence. This could be achieved via  
269 expressing more tandem repeats of spinach, as demonstrated in this work, or its  
270 derivatives in plants. Indeed, since the development of Spinach ([Paige et al., 2011](#)),  
271 several new aptamers such as Spinach2 ([Strack et al., 2013](#)), Baby Spinach ([Huang et](#)  
272 [al., 2014](#)), iSpinach ([Autour et al., 2016](#)), Pandan ([Aw et al., 2016](#)), Broccoli ([Filonov et](#)

273 [al., 2014](#)), RNA-Mango ([Dolgosheina et al., 2014](#)), Corn-DFHO ([Warner et al., 2017](#))  
274 and Pepper ([Chen et al., 2019](#)) have been uncovered and used for RNA visualization.  
275 More recently, a series of fluorescent aptamers based on the modified three-way  
276 junction scaffold and the optimized Broccoli has been reported to be able to visualize  
277 RNA in plants ([Bai et al., 2020](#)). Moreover, Spinach2, Baby Spinach and iSpinach also  
278 use DFHBI as fluorophore, and these derivatives are superior to Spinach in terms of  
279 luminescence intensity and/or the light quenching property ([Filonov et al., 2014; Warner](#)  
280 [et al., 2017; Chen et al., 2019](#)). These newly developed aptamers do not require any  
281 tRNA scaffolds for protection and they can still stably bind to RNA and stimulate  
282 fluorescence ([Filonov et al., 2014; Chen et al., 2019](#)). This can be beneficial for the  
283 virus-based delivery system because recombinant plant viruses tend to lose larger  
284 insert from their genomes while infecting plants ([Qin et al., 2015](#)). Thus, these newer  
285 RNA aptamers offer more options for RNA fluorescence *in planta*. An alternative  
286 strategy to reduce fluorescent noise is to screen novel fluorophore(s) that may be more  
287 specific than DFHBI in their binding to Spinach ([Supplemental Fig. S8](#)). Such a  
288 fluorophore(s), if identified, will certainly be useful to enhance the effectiveness of  
289 Spinach-based RMG in plants.

## 290 **MATERIALS AND METHODS**

### 291 **Plant Materials and Growth**

292 *Nicotiana benthamiana* plants were grown in insect-free growth room at 25°C during  
293 day and 18°C at night under a 50% humidity environment with a 16-hr day/8-hr night  
294 periodic cycle.

### 295 **Construction of Vectors**

296 Original sequences including (i) 73-nucleotides (nt) *AttRNA<sup>Lys</sup>* (K), (ii) 80-nt *Spinach* (S),  
297 (iii) 152-nt *AttRNA<sup>Lys</sup>-AttRNA<sup>Lys</sup>* (KK), (iv) 250-nt *AttRNA<sup>Lys</sup>-Spinach-AttRNA<sup>Lys</sup>* (KSK),  
298 (v) 227-nt T7 promoter-KK, (vi) 374-nt T7 promoter-K-Spinach-K (KSK), (vii) 205-nt  
299 pCVA-KK, and (viii) 352-nt pCVA-KSK are listed in [Supplemental Data Set S1](#). To  
300 obtain double-stranded (ds) KK DNA fragment, a pair of oligonucleotides P001 and  
301 P002 ([Supplemental Table S1](#)) were annealed to form a dsDNA molecule. Then a

302 second pair of oligonucleotides P003 and P004 ([Supplemental Table S1](#)) were also  
303 annealed together. The two dsDNA fragments were cloned into the *MluI/BspEI* sites of  
304 the *Potato virus X* (PVX) based vector ([van Wezel et al., 2001](#)) to generate PVX/KK. An  
305 *EagI* site was introduced between the two Ks ([Fig. 4A](#)). The KK fragment was then  
306 amplified from PVX/KK using different sets of primers ([Supplemental Table S1](#)) and  
307 subcloned into pMD19-T (TAKARA), the *BbsI* site of pBluescript SK+/OsU6 ([Feng et al.](#)  
308 [2013](#)), the *NruI/XhoI* sites of pEAQ-HT ([Sainsbury et al., 2009](#)) or the *XbaI/KpnI* sites of  
309 pCVA ([Chen et al., 2015](#)) to produce pMD19-T/KK ([Fig. 1A](#)), the pBluescript SK+/KK  
310 ([Supplemental Fig. S2A](#)), pEAQ-HT/KK ([Fig. 2A](#)) and pCVA/KK ([Supplemental Fig.](#)  
311 [S6A](#)), respectively. The T7 promoter sequence and a unique *PmlI* site were introduced  
312 to the 5'- or 3'-end of KK in pMD19-T/KK, respectively ([Fig. 1A](#)).

313 We cloned the KSK dsDNA fragment which was commercially produced by  
314 Invitrogen into the *AgeI/SmaI* sites of pEAQ-HT and generated pEAQ-HT/KSK ([Fig. 2A](#)).  
315 The KSK fragment was then amplified from pEAQ-HT/KSK using different sets of  
316 primers ([Supplemental Table S1](#)) and subcloned into pMD19-T, the *BbsI* site of  
317 pBluescript SK+/OsU6, the *MluI/EagI* or *EagI/SalI* sites of PVX, or the *XbaI/KpnI* sites of  
318 pCVA to produce pMD19-T/KSK ([Fig. 1A](#)), the pBluescript SK+/KSK ([Supplemental Fig.](#)  
319 [S2A](#)), PVX/KSK(1) and PVX/KSK(2) ([Fig. 4A](#); [Fig. 5A](#)), and pCVA/KSK ([Supplemental](#)  
320 [Fig. S6A](#)), respectively. For pMD19-T/KSK, T7 promoter sequence was incorporated at  
321 the 5'-end of KSK while a *PmlI* site was introduced at the 3' end of KSK ([Fig. 1A](#)).

322 Construction of PVX/AtFT:KSK, PVX/mAtFT:KSK and PVX/AtTFL1:KSK were all  
323 based on PVX/KSK(2) in which KSK was cloned into the *EagI/SalI* sites (see above).  
324 Wild-type and non-sense mutant Arabidopsis *FT* genes *AtFT* and *mAtFT* were amplified  
325 ([Li et al., 2009](#)) and cloned into the *Clal/EagI* sites of PVX/KSK(2) to generate  
326 PVX/AtFT:KSK and PVX/mAtFT:KSK ([Fig. 4A](#)). Similarly, the AtTFL1 gene was  
327 amplified ([Li et al., 2011](#)) and cloned into *Clal/MluI* sites of PVX/KSK(2) to generate  
328 PVX/AtTFL1:KSK ([Fig. 4A](#)).

329 Tandem repeats of KSK were constructed in PVX/KSK(1) in which KSK was cloned  
330 into the *MluI/EagI* sites of the PVX vector (see above). Insertion of an extra KSK into the  
331 *EagI/BspEI* sites of PVX/KSK(1) (aka PVX/KSK\*1) produced PVX/KSK\*2, then a KSK

332 into the *EcoRV/SalI* sites of PVX/KSK\*2 brought about PVX/KSK\*3. To construct the  
333 PVX/KSK\*4, a KSK was cloned into the *BspEI/EcoRV* sites of PVX/KSK\*3; and  
334 PVX/KSK\*5 was constructed by inserting a KSK into the *Clal/MluI* sites of PVX/KSK\*4  
335 (Fig. 5A).

336 The integrity of the sequence insertions in all constructs was confirmed by Sanger  
337 sequencing.

### 338 **Preparation of DFHBI Solution**

339 Fluorophore DFHBI (3,5-difluoro-4-hydroxybenzylidene imidazolinone) was bought from  
340 Lucerna™ company (<http://www.lucernatechnologies.com/fluorophores-c17/>). DFHBI  
341 was dissolved in DMSO to prepare a 40 mM stock solution. It was then diluted with 100  
342 mM HEPES buffer (pH 7.5) to produce a 2 mM DFHBI/5% DMSO working solution  
343 (Paige et al., 2011). In this work, the final concentration of DFHBI used to trigger  
344 spinach fluorescence was 100-200 μM for spinach-tagged RNA transcripts generated  
345 by in vitro transcription, or 1-2 mM for total RNAs extracted from plant tissues and for in  
346 planta RNA mimicking GFP (RMG) assay.

### 347 **Particle Bombardment and Confocal Microscopy**

348 Plasmid DNA of pEAQ-HT/KK and pEAQ-HT/KSK was prepared from *Escherichia coli* 2  
349 T1<sup>R</sup> cells (Thermo Fisher Scientific) using QIAprep Spin Miniprep Kit, and their  
350 concentration was adjusted to 1 μg/μl. Gold particles were coated with DNA and onion  
351 epidermal cells were particle-bombarded as described (Wydro et al., 2006; Ding et al.,  
352 2009). Briefly, 1.5 mg of gold microcarriers (1 μm in diameter) were washed with 70%  
353 ethanol once and then 100% ethanol twice. After a quick spin, the clean gold  
354 microcarriers were collected, air-dried and resuspended in 50 μl 50% glycerol. Then  
355 10 μg plasmid DNA, 50 μl 2.5M CaCl<sub>2</sub>, 20 μl 0.1M spermidine and 250 μl 70% ethanol  
356 were mixed sequentially and progressively. After a vigorous vortex for 2-3 seconds,  
357 followed by a quick spin, the DNA-coated gold microcarriers were collected, air-dried  
358 and resuspended in 30 μl 100% ethanol. 10 μl DNA-coated gold microcarriers were  
359 dropped onto a microparticles carrier disk (Macrocarriers #1652335, Bio-Rad) and  
360 bombardment was carried out using a PDS-1000/He Biolistic Particle Delivery System

361 (Bio-Rad). After 12 hours culture in a hypertonic medium (0.8 % Phytigel half-strength  
362 Murashige and Skoog (MS) basal medium, 0.256 M (46.67 g/L) sorbitol and 0.256 M  
363 (46.67 g/L) mannitol), onion epidermis was immersed into 100  $\mu$ M DFHBI (3,5-difluoro-  
364 4-hydroxybenzylidene imidazolinone) for 30min, examined and photographed using a  
365 Zeiss LSM 710 confocal laser scanning microscope (Ding et al., 2009; Paige et al.,  
366 2011).

### 367 **Plant Transformation**

368 *N. benthamiana* was transformed by a leaf disc procedure with *Agrobacterium*  
369 *tumefaciens* GV3101 harboring pEAQ-HT/KK or pEAQ-HT/KSK (Hong et al., 1996;  
370 Sainsbury et al., 2009). Primary transformants were selected for resistance to 50  $\mu$ g/ml  
371 kanamycin and further verified by genomic PCR. Following self-pollination, segregation  
372 of T1 and T2 progenies was tested for sensitivity to 50  $\mu$ g/ml kanamycin. Two  
373 homozygous lines with a single of copy of the transgene (as indicated by a 3:1  
374 segregation ratio) for KK (Line 5 and Line 7) or KSK (Line 1 and Line 2) were selected  
375 for RMG analysis.

### 376 **Agroinfiltration Assay**

377 Agroinfiltration assay was performed in young leaves of *N. benthamiana* as previously  
378 described (Bruce et al., 2011; Yu et al., 2018). Briefly, 10 ml of *A. tumefaciens* GV3101  
379 carrying pCVA/KK, pCVA/KSK or pCVB, a *Cabbage leaf-curl geminivirus* (CLCV)-based  
380 vector (Tang et al., 2010; Chen et al., 2015) were cultured to 0.6-0.8 OD<sub>600</sub>.  
381 *Agrobacterium* was then collected by centrifugation at 4,000 rpm for 10 min, and re-  
382 suspended to make the final density of OD<sub>600</sub>=2.0 in sterilized water. *Agrobacterium*  
383 with pCVA/KK or pCVA/KSK was mixed with an equal volume of *agrobacterium* with  
384 pCVB and infiltrated to young leaves of *N. benthamiana* plants at the six-leaf-stage  
385 through a needleless syringe. At 3 day-post-agroinfiltration, leaf tissues were cryo-  
386 sectioned, stained with 200 $\mu$ M DFHBI, examined and photographed using a Zeiss LSM  
387 710 confocal laser scanning microscope. Five milligrams of total RNAs extracted from  
388 agroinfiltrated tissues in 1 mM DFHBI solution were examined and photographed using  
389 a Nikon fluorescent stereomicroscope (SMZ1500) equipped with a DN100 Digital  
390 Internet Camera (Nikon) through a white-light or FITC (fluorescein isothiocyanate) filter.

391 Exposure time was up to 600 seconds dependent on the FITC fluorescent intensity of  
392 samples.

### 393 **Cryo-Sectioning**

394 Plant tissue fixation, embedding and cryo-sectioning were carried out as described  
395 (Dong et al., 2003). Briefly, young leaves from *KK* or *KSK* transgenic plants or virus-  
396 infected *N. benthamiana* leaves were cut into 3 – 5-mm wide strips. Those small leaf  
397 tissues were embedded in the Tissue-Tek (OCT Compound Torrance) and sectioned in  
398 a cryostat at -25°C (Bright Instruments OTS). Ten to fifty-micrometer sections were  
399 mounted in 50% glycerol onto RNase-free slides (Thermo Fisher Scientific). After  
400 adding 20µl 200µM DFHB, sections were covered by RNase free cover glasses  
401 (Thermo Fisher Scientific), examined and photographed using a Zeiss LSM 710  
402 confocal laser scanning microscope.

### 403 **Protoplast Preparation**

404 Rice (*Oryza sativa* L. cv. Nipponbare) grains were sterilized and sowed on 8% agar rice  
405 medium (Yoshida et al., 1976) and cultured in dark at 28 °C for 10-12 days. Stems of  
406 etiolated rice seedlings were cut into 0.5-mm pieces by a sharp blade. The small stem  
407 slices were then immersed in 0.6 M mannitol for 10 minutes (Chen et al., 2006). On the  
408 other hand, young leaves of homozygous *KK* or *KSK* transgenic *N. benthamiana* lines  
409 were collected from one-month old plantlets grown in half-strength MS agar medium,  
410 and cut into 3 by 6-mm wide-length strips by a sharp blade. The small rice stem pieces  
411 and the *KK* or *KSK* transgenic leaf strips were digested in W5 solution (2 mM MES, 154  
412 mM NaCl, 125 mM CaCl<sub>2</sub> and 5 mM KCl, pH=5.7) with 1.5% cellulase R10 and 0.4%  
413 macerozyme R10 for 2-3 hours at room temperature in dark to release protoplasts.  
414 Protoplasts were collected by centrifugation at 100 g after filtrating out undigested stem  
415 or leaf tissues through 75 µm nylon mesh, and re-suspended in MMG solution (4 mM  
416 MES, 0.4 M mannitol and 15 mM MgCl<sub>2</sub>, pH=5.7) with 1 mM DFHBI (Yoo et al., 2007).  
417 *KK* or *KSK* transgenic *N. benthamiana* protoplasts were examined and photographed  
418 using a Zeiss LSM 710 confocal laser scanning microscope.

### 419 **PEG-mediated Transfection**

420 Ten micrograms of pBluescriptSK+/KK or pBluescriptSK+/KSK plasmid DNA were  
421 mixed gently with 100  $\mu$ l rice protoplast resuspension ( $2 \times 10^4$ ). To the protoplast and  
422 DNA mixture, 110  $\mu$ l PEG-calcium transfection solution (0.2M mannitol, 40% PEG4000,  
423 100mM  $\text{CaCl}_2$ ) were added and mixed gently but completely. After incubation at room  
424 temperature for 5-15min, transfection process was terminated by adding 400-440  $\mu$ l W5  
425 solution. The transfection mixture was then centrifuged at 100g for 2 min and the  
426 transfected protoplasts were collected, re-suspended in WI solution (4 mM MES, 0.5 M  
427 mannitol and 20 mM KCl, pH=5.7) with 1 mM DFHBI, examined and photographed  
428 using a Zeiss LSM 710 confocal laser scanning microscope (Yoo et al., 2007; Ding et  
429 al., 2009).

### 430 ***In Vitro* Transcription**

431 Production of infectious PVX recombinant RNA transcripts was produced by in vitro  
432 transcription as described (Hong et al., 2001; Yu et al., 2020). Briefly, plasmid DNA of  
433 PVX/KK, PVX/KSK\*1, PVX/KSK\*2, PVX/KSK\*3, PVX/KSK\*4, PVX/KSK\*5 and  
434 PVX/GFP was linearized by *SpeI* whilst pMD19-T/KK and pMD19-T/KSK plasmids were  
435 linearized by *PmlI*. The final concentration of purified linear plasmid DNA was 0.25  
436  $\mu$ g/ $\mu$ l. In vitro transcription was performed using 2.5  $\mu$ g linear plasmid DNA as template  
437 and T7 RNA polymerase (NBL). Purified RNA transcripts were routinely dissolved in 40  
438  $\mu$ l in RNase-free water (Hong et al., 2001; Yu et al., 2020). Ten microliters of in vitro  
439 PVX RNA transcripts were mixed with 10- $\mu$ l 200  $\mu$ M DFHBI, incubated at 75°C for 5  
440 min, then immediately cooled on ice, examined and photographed using a Nikon  
441 fluorescent stereomicroscope. The rest of RNA transcripts was used for virus-based  
442 RNA mimicking GFP assays in plants.

### 443 **Virus-based RMG Assay**

444 Young leaves of *N. benthamiana* plants at six-leaf stage were inoculated with PVX  
445 recombinant RNA transcripts as described (Qin et al., 2017). In brief, the fourth and fifth  
446 fully expanded young leaves were dusted with a thin layer of carborundum (quartz sand,  
447 approximately 500  $\mu$ m in diameter). A total of 20  $\mu$ l viral RNA transcripts was dropped  
448 onto the two young leaves. Mechanical inoculation was then performed by gently finger-  
449 rubbing these leaves. Chlorotic lesions on inoculated leaves, characteristic of local PVX



450 infection, typically appeared 3-4 days post inoculation (DPI), and systemic chlorosis  
451 developed on young leaves at 7 DPI and onwards. At 14-17 DPI, leaves showing clear  
452 chlorotic lesions were collected, cryo-sectioned, examined and photographed in the  
453 presence of 1mM DFHBI using a Zeiss LSM 710 confocal laser scanning microscope.  
454 At 17 DPI, total RNA was extracted from young leaves showing visible viral chlorosis  
455 symptoms using Qiagen RNeasy Plant Mini Kit. Ten milligrams of total RNA were mixed  
456 with 1 mM DFHBI, incubated at 75°C for 5 min, then immediately cooled on ice,  
457 examined and photographed using a Nikon fluorescent stereomicroscope equipped with  
458 a DN100 Digital Internet Camera (Nikon) ([Paige et al., 2011](#)).

### 459 **Quantitative RMG assay**

460 (i) Preparation of FITC solutions: To prepare 1 mg/ml ( $2.568 \times 10^3 \mu\text{M}$ ) FITC stock  
461 solution, 1 mg fluorescein isothiocyanate isomer I powder (FITC, MW=389.38, Sigma-  
462 Aldrich) was dissolved in 1ml DMSO. We then prepared 5-ml 500  $\mu\text{M}$  FITC solution by  
463 mixing 973.52  $\mu\text{l}$  FITC stock solution with 4,026.48  $\mu\text{l}$  Phosphate-Buffered Saline (PBS,  
464 1.06mM  $\text{KH}_2\text{PO}_4$ , 155.17 mM NaCl, 2.97 mM  $\text{Na}_2\text{HPO}_4$ , pH= 7.4). Through a series of  
465 dilution in PBS by a factor of two, we prepared 5-ml FITC solution of 250  $\mu\text{M}$ , 125  $\mu\text{M}$ ,  
466 62.5  $\mu\text{M}$ , 31.25  $\mu\text{M}$ , 15.625  $\mu\text{M}$ , 7.8125  $\mu\text{M}$ , 3.90625  $\mu\text{M}$ , 1.95  $\mu\text{M}$ , 0.976  $\mu\text{M}$ , 0.488  $\mu\text{M}$ ,  
467 0.244  $\mu\text{M}$ , and 0.122  $\mu\text{M}$ , respectively. FITC fluorescence was observed under a Nikon  
468 fluorescent stereomicroscope (SMZ1500) and photographed using a DN100 Digital  
469 Internet Camera (Nikon) through a FITC (fluorescein isothiocyanate) filter or under  
470 transmitted white light ([Supplemental Fig. S4A-C](#)).

471 (ii) FITC Standard Curve: For each concentration point, the intensity of FITC was  
472 measured in three – six biological duplicates using Fluorescence Spectrophotometer  
473 DS-11 FX (Denovix). PBS was used as a negative control. Fluorescent value was  
474 determined as a relative fluorescence unit (RFU) under long-pass emission at 514-567  
475 nm and blue-led excitation at approximately 470nm. Oversaturation of fluorescence at  
476 higher concentration of the FITC solutions was clearly visible ([Supplemental Fig. S4A](#)  
477 [and B](#)). This phenomenon was reflected by abnormal RFU reading, likely due to out of  
478 detection limit of the spectrophotometer ([Supplemental Fig. S5](#)). Nevertheless, a

479 standard curve could be drawn from our measurements from which an equation for RFU  
480 (Y-axis) vs FITC concentration (X-axis) was deduced ([Supplemental Fig. S5](#)).

481 (iii) Quantitative RMG assay: A highly correlated equation  $y = 79297x - 9698$  ( $R^2 =$   
482  $0.9978$ ) was formulated by the Excel built-in software to quantitate RMG equivalent to  
483 the concentration range of 0 - 7.8125  $\mu\text{M}$  FITC ([Supplemental Fig. S5](#)), where x  
484 represents the FITC micromolar concentration ( $\mu\text{M}$ ) and y represents RFU. Based on  
485 the RFU readings for in vitro RNA transcripts or total RNA extracted from leaf tissues,  
486 we used this equation and calculated the strength of in vitro and ex vivo RMG in [Fig. 5F](#);  
487 [Fig. 6F](#) and [Supplemental Fig. S3](#).

#### 488 **Nuclear acid Extraction, PCR and RT-PCR**

489 Total RNA was extracted from leaf tissues using the RNeasy Plant Mini Kit (Qiagen).  
490 First-strand cDNA was synthesized using a Fast Quant RT Kit with gDNA Eraser  
491 (Tiangen). Genomic DNA was isolated from transgenic leaf tissues using the DNeasy  
492 Plant Mini Kit (Qiagen). RT-PCR or genomic PCR were performed using specific  
493 primers ([Supplemental Table S1](#)). *GAPDH* gene was used as an internal control ([Qin et](#)  
494 [al., 2012](#)).

#### 495 **Data availability**

496 Data supporting the findings of this work are available within the paper and its  
497 Supplemental Information files.

#### 498 **Supplemental Data**

499 The following supplemental materials are available.

500 **Supplemental Data Set S1.** Sequence information

501 **Supplemental Table S1.** Primers used in this study

502 **Supplemental Figure S1.** Spinach-based RMG in onion epidermal cells.

503 **Supplemental Figure S2.** Transient expression of Spinach in rice protoplasts

504 **Supplemental Figure S3.** Quantitative fluorescence of RNAs

505 **Supplemental Figure S4.** Fluorescence of FITC solutions

506 **Supplemental Figure S5.** Standard curve - FITC concentration vs fluorescence  
507 intensity

508 **Supplemental Figure S6.** DNA geminivirus-based RMG

509 **Supplemental Figure S7.** Infection of *N. benthamiana* by recombinant PVX

510 **Supplemental Figure S8.** Staining of RNA but not DNA by DFHBI.

## 511 ACKNOWLEDGEMENTS

512 We thank Samine R Jaffery for providing us the pET28-c/Spinach2 plasmid and  
513 precious advices on RMG; Jiankang Zhu for the CRIPSR/Cas9 plasmid; Chun Wang,  
514 Lan Shen, Xixun Hu and Kejian Wang for their technical support and advice on  
515 preparation of rice protoplasts; Tien-Shin Yu for constructive advice on RMG; David  
516 Baulcombe for the original *Potato virus X*-based vector.

## 517 FIGURE LEGENDS

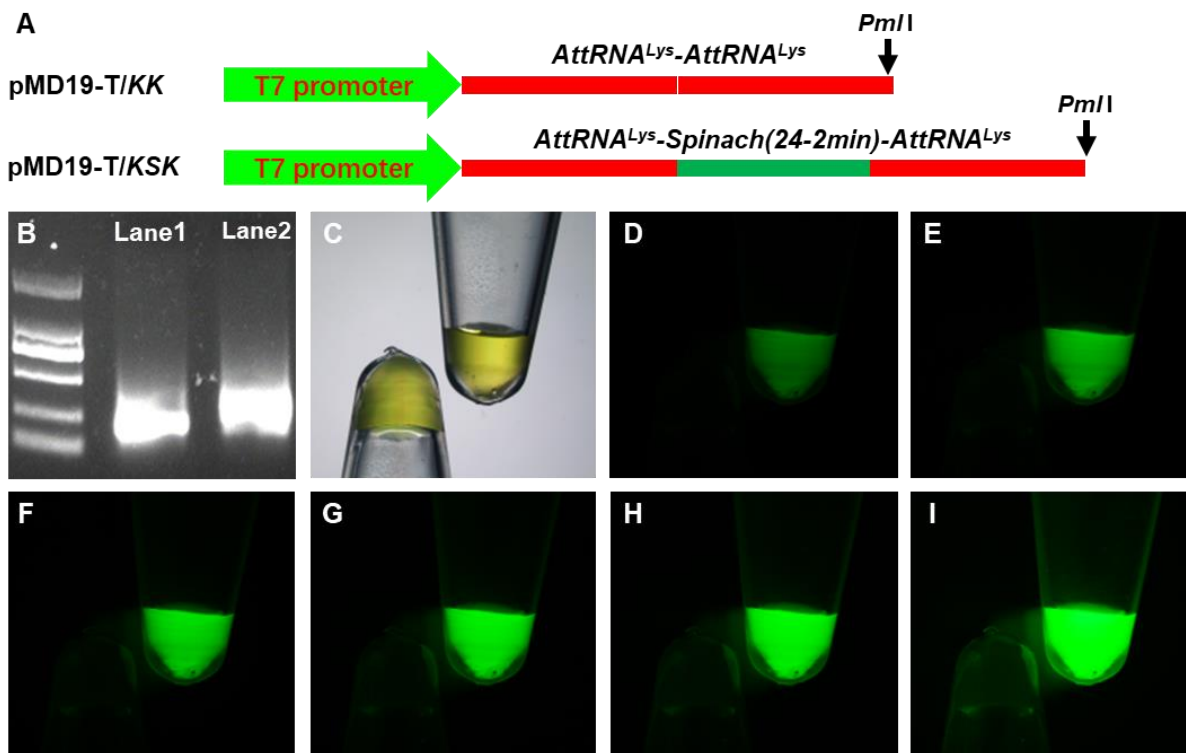

518

519 **Figure 1.** In vitro Spinach RNA fluorescence. A, Diagrammatic of KK and KSK  
 520 expression cassettes in pMD19-T. KK (negative control) and KSK were transcribed from  
 521 *Pml*-linearized pMD19-T/KK or pMD19-T/KSK under the control of the T7 promoter.  
 522 Detailed sequences of KK and KSK are included in [Supplemental Data Set S1](#). B, 1.5%  
 523 TAE-Agarose gel electrophoresis of KK and KSK RNA transcripts. KK and KSK RNA  
 524 transcripts were loaded on Lane 1 and Lane 2, respectively. Marker: DM2000. C-I, KK  
 525 and KSK RNA transcripts in 100  $\mu$ M DFHBI solution. Photographs were taken under  
 526 transmitted white light channel (C), or under FITC channel at the exposure time of 2 (D),  
 527 4 (E), 6 (F), 8 (G), 10 (H) and 20 (I) seconds using a Fluorescence Stereomicroscope.  
 528 The concentration of KK and KSK RNA transcripts (C-I) was 2,915.70 and 2,969.55  
 529 ng/ $\mu$ l, respectively.

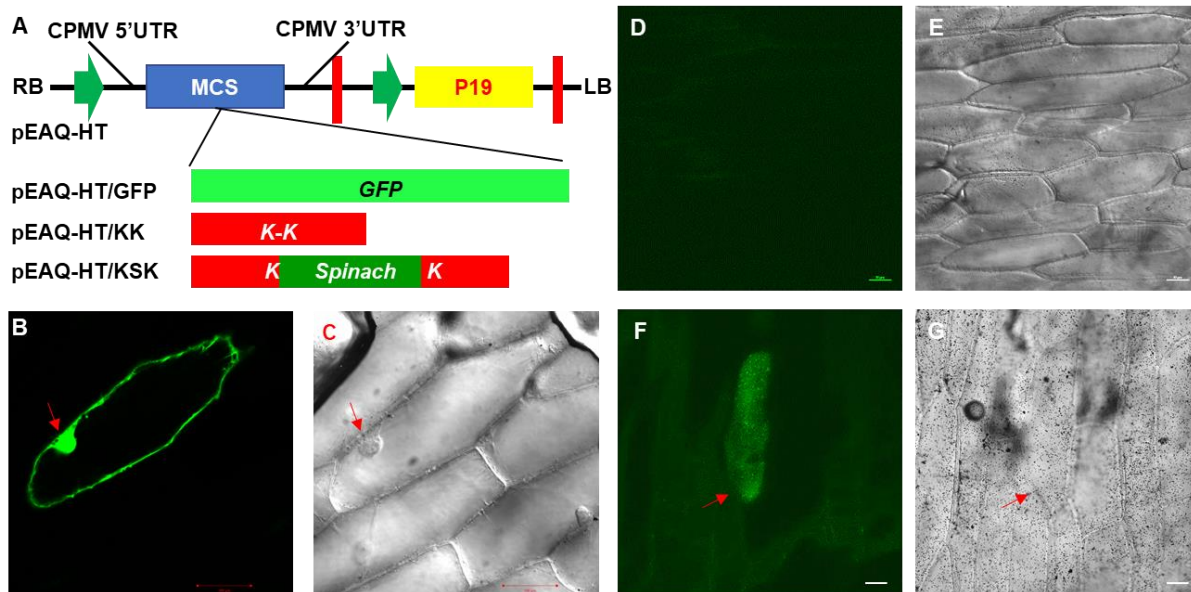

530  
 531 **Figure 2.** RMG in onion epidermal cells. A, Schematic of GFP, KK and KSK expression  
 532 cassettes in pEAQ-HT. GFP, KK and KSK coding sequences were cloned into MCS of  
 533 pEAQ-HT. Green arrows: 35S CaMV promoter sequences. Red thick lines: CaMV  
 534 terminator sequences. MCS: multiple cloning site. CPMV 5'- and 3'-UTR: cowpea  
 535 mosaic virus 5' and 3' untranslated regions which act as translational enhancer. P19:  
 536 Tombusvirus silencing suppressor protein. B-G, RMG in onion epidermal cells. As a  
 537 control, onion epidermal cells were bombarded with pEAQ-HT/GFP and showed GFP  
 538 fluorescence at 12 hours after bombardment (HAB, B and C). Onion epidermis was

539 bombarded with pEAQ-HT/KK (D and E) or pEAQ-HT/KSK (F and G). Green  
540 fluorescence was observed only in onion epidermal cells expressing KSK from with  
541 pEAQ-HT/KSK (F) at 12 HAB. Photographs were taken under FITC channel (B, D and  
542 F) or through transmitted light (C, E and G). Bar = 100  $\mu$ m in B and C; bar = 50  $\mu$ m in D-  
543 G; Red arrows indicate cells showing green fluorescence.

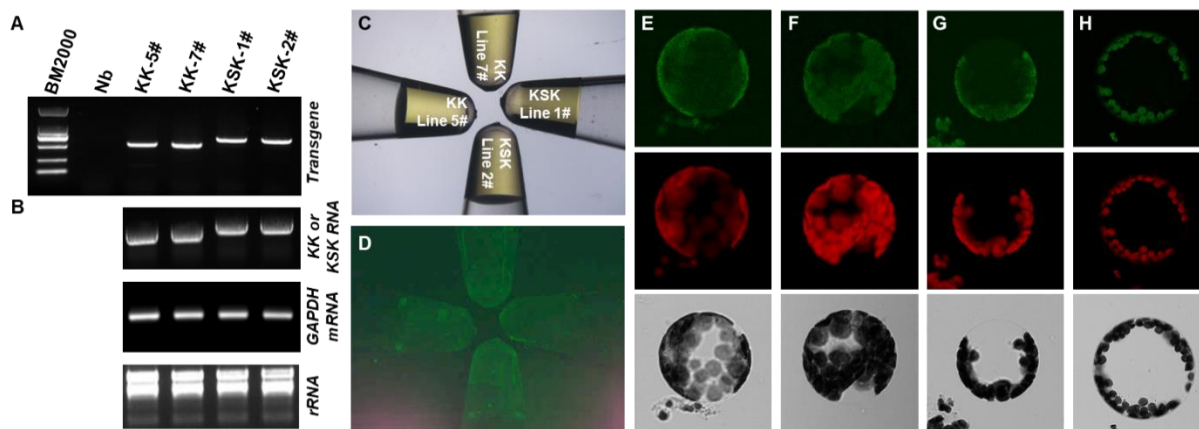

544

545 **Figure 3.** RMG in transgenic plants. A, Genomic PCR confirmation of *KK* and *KSK*  
546 transgenes in independent *Nicotiana benthamiana* transformants. B, Transgenic  
547 expression of *KK* and *KSK*. RT-PCR detection of *KK* and *KSK* RNA transcripts (Top  
548 panel), and *GAPDH* mRNA (Middle panel). PCR consisted of 25 cycles for *GAPDH* or  
549 35 cycles for *KK* and *KSK*. Total RNA was also analyzed by 1% agarose-TAE gel  
550 electrophoresis (Bottom panel). C and D, Ex vivo fluorescence of plant RNAs. Twenty  
551 microliter solution with 100- $\mu$ M DFHBI and 750- $\mu$ g/ $\mu$ l total RNA extracted from young  
552 leaf tissues of the *KK* and *KSK* transgenic plants was photographed under transmitted  
553 white light (C) or FITC filter (D). E – H, RMG in protoplasts. Protoplasts were isolated  
554 from the *KK* (E and F) or *KSK* (G and H) transgenic plant leaves with (F and H) or  
555 without (E and G) 400- $\mu$ M DFHBI. Photographs were taken under FITC (Top panel), red  
556 (Middle panel) filter or transmitted light (Bottom panel).

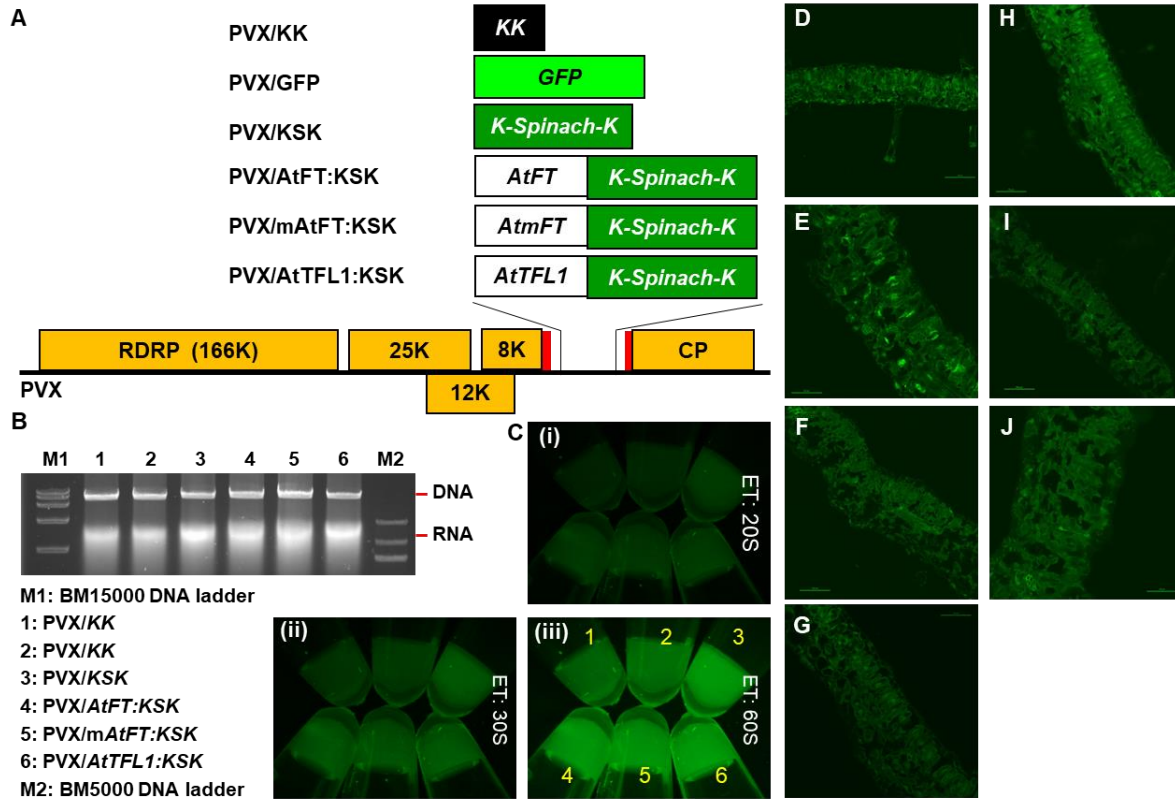

557

558 **Figure 4.** Virus-based RMG. A, Potato virus X (PVX)-based RMG constructs. The RNA  
 559 genome of PVX encodes an RNA-dependent RNA polymerase (RDRP), a triple-gene  
 560 block for three movement proteins of 25K, 12K and 8K, as well as a coat protein (CP).  
 561 GFP, KK, KSK and the wild-type and mutant Arabidopsis *FT* and *TFL1* genes were  
 562 cloned into the PVX-based vector as outlined. The two thin red boxes indicate the  
 563 duplicated CP subgenomic RNA promoter. B, Recombinant PVX RNA transcripts.  
 564 Transcripts were generated by in vitro transcription and analyzed through a 1%  
 565 Agarose-TAE gel. C, Fluorescence of recombinant PVX RNAs generated by in vitro  
 566 transcription. The number corresponding to in vitro RNA samples (10 µg) are same as  
 567 indicated in B. Exposure time (ET) for photographing was 20 (i), 30 (ii), and 60 (iii)  
 568 seconds (S). D-J, Fluorescent images of cryo-sections of systematic leaves. *N.*  
 569 *benthamiana* plants were mock-inoculated (D), or infected with PVX/GFP (E); PVX/KK  
 570 (F); G. PVX/KSK (G); H. PVX/AtFT:KSK (H); I. PVX/AtmFT:KSK (I); or  
 571 PVX/AtTFL1:KSK (J). Sections were immersed in 200 µM DFHBI. D-J. Bar = 50 µM (D-  
 572 J).

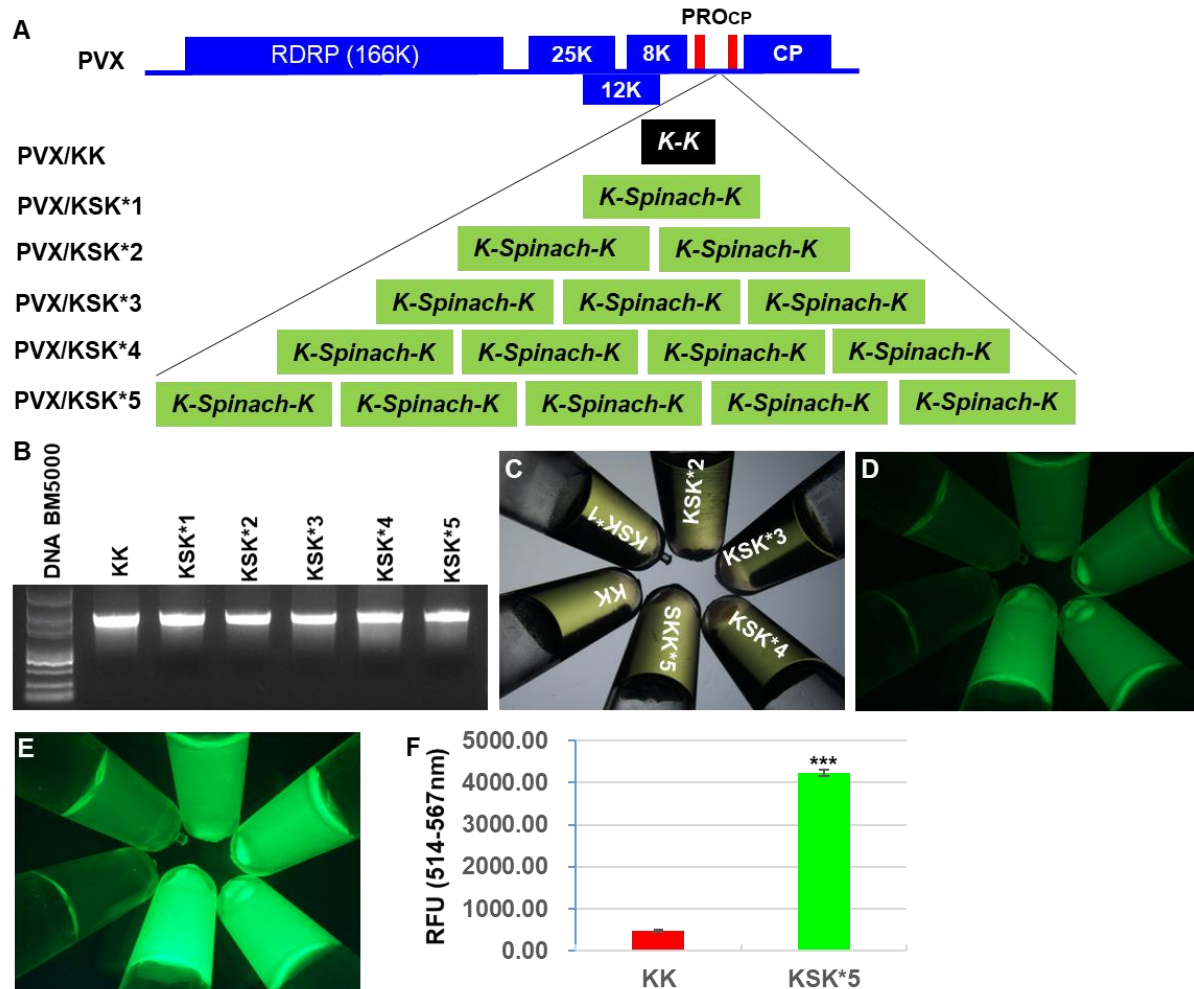

573

574 **Figure 5.** Tandem repeats of Spinach enhance fluorescence in vitro. A, Schematic  
 575 diagrammatic of the tandem repeats of spinach in PVX-based vector. The RNA genome  
 576 of PVX encodes an RNA-dependent RNA polymerase (RDRP), a triple-gene block for  
 577 three movement proteins of 25K, 12K and 8K, as well as a coat protein (CP).  
 578 Expression of KK, KSK or repeated KSK RNA was under the control of the duplicated  
 579 CP subgenomic RNA promoter (PRO<sub>CP</sub>, thin red box). B, Production of KK and KSK  
 580 RNA transcripts. 1 µg in vitro recombinant PVX RNA was analyzed by 1% Agarose-TAE  
 581 gel electrophoresis. C-E, In vitro fluorescence of PVX recombinant RNA. PVX  
 582 recombinant RNA samples (10 µg) containing 200µM DFHBI were observed through  
 583 transmission detector (C) and FITC filter (D and E). Exposure time was 40 (D) and 150  
 584 (E) seconds, respectively. The order of samples is the same as indicated in C. F,  
 585 Quantitative fluorescence. RNA fluorescence was measured as relative fluorescence

586 units (RFU) for PVX/KK and PVX/KSK\*5 transcripts generated by in vitro transcription.  
587 The RFU value is shown as Mean  $\pm$  SD (n = 3). Student's *t*-test showed a significant  
588 difference between PVX/KK and PVX/KSK\*5 ( $P \leq 3.05 \times 10^{-7}$ , indicated by 3 asterisks).  
589 Using the equation drawn from the FITC vs fluorescence standard curve ([Supplemental](#)  
590 [Fig. S3A-C](#) and [Supplemental Fig. S4](#)), we calculated the fluorescence emitted from the  
591 'in vitro RNA transcripts' for PVX/KK and PVX/KSK\*5 was equivalent to that emitted by  
592 0.1044  $\mu$ M and 0.1518  $\mu$ M FITC respectively.

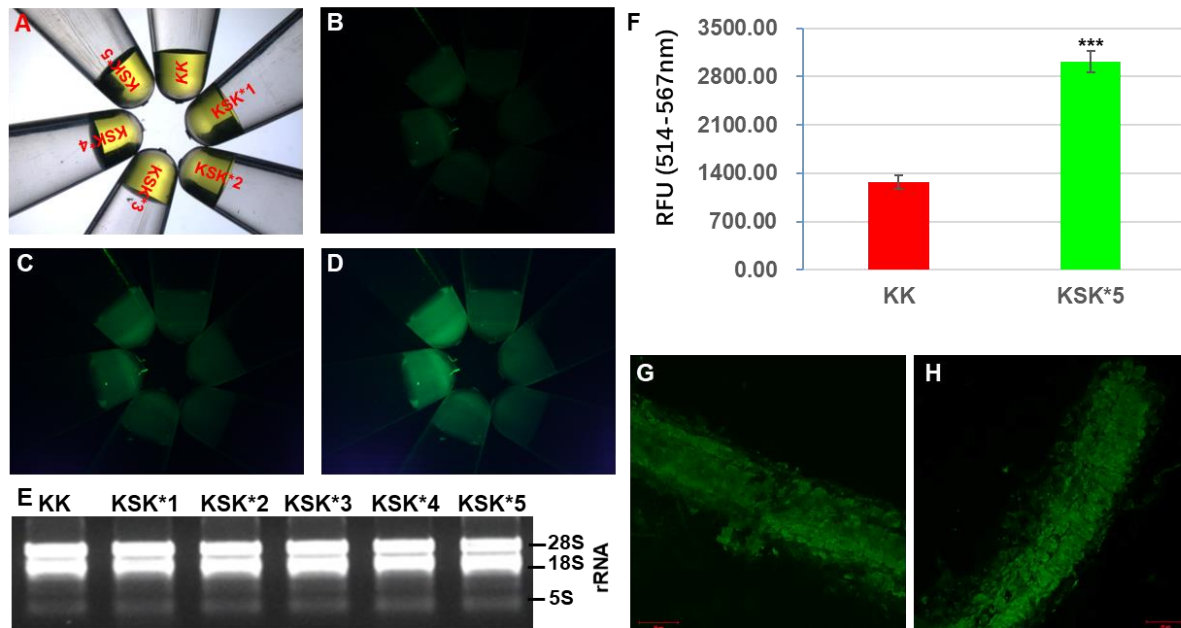

593

594 **Figure 6.** PVX/KSK\*5-mediated RMG. A-D, Ex vivo analysis of plant RNAs. 10 mg of  
595 total RNA extracted from *N. benthamiana* young leaf tissues infected with PVX/KK (KK),  
596 PVX/KSK\*1 (KSK\*1), PVX/KSK\*2 (KSK\*2), PVX/KSK\*3 (KSK\*3), PVX/KSK\*4 (KSK\*4)  
597 or PVX/KSK\*5 (KSK\*5) were mixed with 1-mM DFHBI and photographed under  
598 transmitted light (A) or FITC channel (B-D). Exposure time was 150 (B), 300 (C) and  
599 600 (D) seconds, respectively. E, Gel analysis of total plant RNA. 5S, 18S and 28S  
600 rRNA are indicated. F, Quantitative fluorescence. RNA fluorescence was measured as  
601 relative fluorescence units (RFU) for total RNA extracted from plant leaves infected with  
602 PVX/KK and PVX/KSK\*5. The RFU value is shown as Mean  $\pm$  SD (n = 3). Student's *t*-  
603 test showed a significant difference between PVX/KK and PVX/KSK\*5 ( $P \leq 0.00035$ ,  
604 indicated by 3 asterisks). G and H, Fluorescent images of cryo-sections of young



605 systematic leaves of *N. benthamiana* plants infected with PVX/KK (G) or PVX/KSK\*5  
606 (H). Sections were treated with 200- $\mu$ M DFHBI. Using the equation drawn from the FITC  
607 vs fluorescence standard curve ([Supplemental Fig. S3A-C](#) and [Supplemental Fig. S4](#)),  
608 we calculated the fluorescence emitted from total RNA extracted from PVX/KK and  
609 PVX/KSK\*5-infected leaf tissues was equivalent to that emitted by 0.1143  $\mu$ M and  
610 0.1364  $\mu$ M FITC respectively.

611 **LITERATURE CITED**

612 **Abudayyeh OO, Gootenberg JS, Essletzbichler P, Han S, Joung J, Belanto JJ, Verdine V, Cox DBT, Kellner**  
613 **MJ, Regev A, Lander ES, Voytas DF, Ting AY, Zhang F** (2017). RNA targeting with CRISPR-Cas13. *Nature*  
614 550: 280-284.

615 **Autour A, Westhof E, Ryckelynck M** (2016). iSpinach: a fluorogenic RNA aptamer optimized for in vitro  
616 applications. *Nucleic Acids Res* 44: 2491-2500.

617 **Aw SS, Tang MX, Teo YN, Cohen SM** (2016). A conformation-induced fluorescence method for  
618 microRNA detection. *Nucleic Acids Res* 44: e92.

619 **Bai JY, Luo Y, Wang X, Li S, Luo M, Yin M, Zuo YL, Li GL, Yao JY, Yang H, Zhang MD, Wei W, Wang ML,**  
620 **Wang R, Fan CH, Zhao Y** (2020). A protein-independent fluorescent RNA aptamer reporter system for  
621 plant genetic engineering. *Nat Commun* 11: 3847.

622 **Banerjee AK, Chatterjee M, Yu Y, Suh SG, Miller WA, Hannapel DJ** (2006). Dynamics of a mobile RNA of  
623 potato involved in a long-distance signaling pathway. *Plant Cell* 18: 3443-3457.

624 **Bertrand E, Chartrand P, Schaefer M, Shenoy SM, Singer RH, Long RM** (1998). Localization of ASH1  
625 mRNA particles in living yeast. *Mol Cell* 2: 437-445.

626 **Bruce G, Gu M, Shi N, Liu Y, Hong Y** (2011) Influence of retinoblastoma-related gene silencing on the  
627 initiation of DNA replication by African cassava mosaic virus Rep in cells of mature leaves in *Nicotiana*  
628 *benthamiana* plants. *Virology* 518: 561.

629 **Buhtz A, Springer F, Chappell L, Baulcombe DC, Kehr J** (2008). Identification and characterization of  
630 small RNAs from the phloem of *Brassica napus*. *Plant J* 53: 739-749.

631 **Carrington JC, Kasschau KD, Mahajan SK, Schaad MC** (1996). Cell-to-Cell and Long-Distance Transport of  
632 Viruses in Plants. *Plant Cell* 8: 1669-1681.

633 **Chen S, Tao L, Zeng L, Vega-Sanchez ME, Umemura K, Wang GL** (2006). A highly efficient transient  
634 protoplast system for analyzing defence gene expression and protein-protein interactions in rice. *Mol*  
635 *Plant Pathol* 7: 417-427.

636 **Chen W, Zhang Q, Kong J, Hu F, Li B, Wu C, Qin C, Zhang P, Shi N, Hong Y** (2015). MR VIGS: MicroRNA-  
637 Based Virus-Induced Gene Silencing in Plants. In: Mysore K., Senthil-Kumar M. (eds) *Plant Gene*  
638 *Silencing. Methods in Molecular Biology*, vol 1287. Humana Press, New York, NY.  
639 [https://doi.org/10.1007/978-1-4939-2453-0\\_11](https://doi.org/10.1007/978-1-4939-2453-0_11)

640 **Chen W, Zhang X, Fan Y, et al** (2018). A genetic Nnetwork for systemic RNA silencing in plants. *Plant*  
641 *Physiol.* 176: 2700-2719.

- 642 **Chen X, Zhang D, Su N, Bao B, Xie X, Zuo F, Yang L, Wang H, Jiang L, Lin Q, Fang M, Li N, Hua X, Chen Z,**  
643 **Bao C, Xu J, Du W, Zhang L, Zhao Y, Zhu L, Loscalzo J, Yang Y** (2019). Visualizing RNA dynamics in live  
644 cells with bright and stable fluorescent RNAs. *Nat Biotechnol* 37:1287-1293.
- 645 **Deeken R, Ache P, Kajahn I, Klinkenberg J, Bringmann G, Hedrich R** (2008). Identification of *Arabidopsis*  
646 *thaliana* phloem RNAs provides a search criterion for phloem-based transcripts hidden in complex  
647 datasets of microarray experiments. *Plant J* 55:746-759.
- 648 **Ding WN, Yu ZM, Tong YL, Huang W, Chen HM, Wu P** (2009). A transcription factor with a bHLH domain  
649 regulates root hair development in rice. *Cell Res.* 19: 1309-1311.
- 650 **Dolgosheina EV, Jeng SC, Panchapakesan SS, Cojocar R, Chen PS, Wilson PD, Hawkins N, Wiggins PA,**  
651 **Unrau PJ** (2014). RNA mango aptamer-fluorophore: a bright, high-affinity complex for RNA labeling and  
652 tracking. *ACS Chem Biol* 9: 2412-2420.
- 653 **Dong X, Van Wezel R, Stanley J, Hong Y** (2003) Functional characterization of the nuclear localization  
654 signal for a suppressor of posttranscriptional gene silencing. *Journal of virology* 77: 7026-7033.
- 655 **Ehrhardt DW, Frommer WB** (2012). New technologies for 21st century plant science. *Plant Cell* 24: 374-  
656 394.
- 657 **Ellison EE, Nagalakshmi U, Gamo ME, Huang PJ, Dinesh-Kumar S, Voytas DF** (2020). Multiplexed  
658 Heritable Gene Editing Using RNA Viruses and Mobile Single Guide RNAs. *Nat Plants* 6: 620-624.
- 659 **Feng Z, Zhang B, Ding W, Liu X, Yang DL, Wei P, Cao F, Zhu S, Zhang F, Mao Y, Zhu JK** (2013). Efficient  
660 genome editing in plants using a CRISPR/Cas system. *Cell Res* 23: 1229-1232.
- 661 **Filipovska A, Rackham O** (2012). Modular recognition of nucleic acids by PUF, TALE and PPR proteins.  
662 *Mol Biosyst* 8: 699-708.
- 663 **Filonov GS, Moon JD, Svensen N, Jaffrey SR** (2014). Broccoli: rapid selection of an RNA mimic of green  
664 fluorescent protein by fluorescence-based selection and directed evolution. *J Am Chem Soc* 136: 16299-  
665 16308.
- 666 **Guet D, Burns LT, Maji S, Boulanger J, Hersen P, Wentz SR, Salamero J, Dargemont C** (2015). Combining  
667 Spinach-tagged RNA and gene localization to image gene expression in live yeast. *Nat Commun* 6: 8882.
- 668 **Haywood V, Yu TS, Huang NC, Lucas WJ** (2005). Phloem long-distance trafficking of GIBBERELLIC ACID-  
669 INSENSITIVE RNA regulates leaf development. *Plant J* 42: 49-68.
- 670 **Hong Y, Davies DL, Van Wezel R, Ellerker BE, Morton A, Barbara D** (2001). Expression of the  
671 immunodominant membrane protein of chlorantia-aster yellows phytoplasma in *Nicotiana*  
672 *benthamiana* from a potato virus X-based vector. *Acta horticulturae* 550: 409-415.

- 673 **Hong Y, Saunders K, Hartley MR, Stanley J** (1996). Resistance to geminivirus infection by virus-induced  
674 expression of dianthin in transgenic plants. *Virology* 220: 119-127.
- 675 **Huang H, Suslov NB, Li NS, Shelke SA, Evans ME, Koldobskaya Y, Rice PA, Piccirilli JA** (2014). A G-  
676 quadruplex-containing RNA activates fluorescence in a GFP-like fluorophore. *Nat Chem Biol* 10: 686-691.
- 677 **Huang K, Doyle F, Wurz ZE, Tenenbaum SA, Hammond RK, Caplan JL, Meyers BC** (2017). FASTmiR: an  
678 RNA-based sensor for in vitro quantification and live-cell localization of small RNAs. *Nucleic Acids Res* 45:  
679 e130.
- 680 **Huang NC, Jane WN, Chen J, Yu TS** (2012). Arabidopsis thaliana CENTRORADIALIS homologue (ATC) acts  
681 systemically to inhibit floral initiation in Arabidopsis. *Plant J* 72: 175-184.
- 682 **Jackson SD, Hong Y** (2012). Systemic movement of FT mRNA and a possible role in floral induction. *Front*  
683 *Plant Sci* 3: 127.
- 684 **Kim G, LeBlanc ML, Wafula EK, dePamphilis CW, Westwood JH** (2014). Genomic-scale exchange of  
685 mRNA between a parasitic plant and its hosts. *Science* 345: 808-811.
- 686 **Lai T, Wang X, Ye B, Jin M, Chen W, Wang Y, Zhou Y, Blanks AM, Gu M, Zhang P, Zhang X, Li C, Wang H,**  
687 **Liu Y, Gallusci P, Tör M, Hong Y** (2020) Molecular and functional characterization of the SBP-box  
688 transcription factor SPL-CNR in tomato fruit ripening and cell death. *J Exp Bot* 71: 2995-3011.
- 689 **Li C, Gu M, Shi N, Zhang H, Yang X, Osman T, Liu Y, Wang H, Vatish M, Jackson S, Hong Y** (2011). Mobile  
690 FT mRNA contributes to the systemic florigen signalling in floral induction. *Sci Rep* 1:73.
- 691 **Li C, Zhang K, Zeng X, Jackson S, Zhou Y, Hong Y** (2009). A cis element within flowering locus T mRNA  
692 determines its mobility and facilitates trafficking of heterologous viral RNA. *J Virol* 83: 3540-3548.
- 693 **Liu L, Chen X** (2018). Intercellular and systemic trafficking of RNAs in plants. *Nat Plants* 4: 869-878.
- 694 **Lu KJ, Huang NC, Liu YS, Lu CA, Yu TS** (2012). Long-distance movement of Arabidopsis FLOWERING  
695 LOCUS T RNA participates in systemic floral regulation. *RNA Biol* 9: 653-662.
- 696 **Luo KR, Huang NC, Yu TS** (2018). Selective targeting of mobile mRNAs to plasmodesmata for cell-to-cell  
697 movement. *Plant Physiol* 177: 604-614.
- 698 **Ma X, Zhang Q, Zhu Q, Liu W, Chen Y, Qiu R, Wang B, Yang Z, Li H, Lin Y, Xie Y, Shen R, Chen S, Wang Z,**  
699 **Chen Y, Guo J, Chen L, Zhao X, Dong Z, Liu YG** (2015). A Robust CRISPR/Cas9 System for Convenient,  
700 High-Efficiency Multiplex Genome Editing in Monocot and Dicot Plants. *Mol Plant* 8: 1274-1284.
- 701 **Nelles DA, Fang MY, O'Connell MR, Xu JL, Markmiller SJ, Doudna JA, Yeo GW** (2016). Programmable  
702 RNA Tracking in Live Cells with CRISPR/Cas9. *Cell* 165: 488-496.

- 703 **Notaguchi M, Higashiyama T, Suzuki T** (2015). Identification of mRNAs that move over long distances  
704 using an RNA-Seq analysis of Arabidopsis/Nicotiana benthamiana heterografts. *Plant Cell Physiol* 56:  
705 311-321.
- 706 **Paige JS, Wu KY, Jaffrey SR** (2011). RNA mimics of green fluorescent protein. *Science* 333: 642-646.
- 707 **Pothoulakis G, Ceroni F, Reeve B, Ellis T** (2014). The spinach RNA aptamer as a characterization tool for  
708 synthetic biology. *ACS Synth Biol* 3: 182-187.
- 709 **Qin C, Chen W, Shen J, Cheng L, Akande F, Zhang K, Yuan C, Li C, Zhang P, Shi N, Cheng Q, Liu Y,**  
710 **Jackson S, Hong Y** (2017) A virus-induced assay for functional dissection and analysis of monocot and  
711 dicot flowering time genes. *Plant Physiol.* 174: 875-885.
- 712 **Qin C, Shi N, Gu M et al** (2012) Involvement of RDR6 in short-range intercellular RNA silencing in  
713 *Nicotiana benthamiana*. *Sci Rep* 2: 467.
- 714 **Qin C, Zhang Q, He M, Kong J, Li B, Mohamed A, Chen W, Zhang P, Zhang X, Yu Z, et al.** (2015) Virus  
715 technology for functional genomics in plants. In P Poltronieri and Y Hong, eds, *Applied Plant Genomics*  
716 and Biotechnology. Elsevier Woodhead Publishing, Cambridge, UK, pp 229–236.
- 717 **Ruiz-Medrano R, Xoconostle-Cázares B, Lucas WJ** (1999). Phloem long-distance transport of CmNACP  
718 mRNA: implications for supracellular regulation in plants. *Development* 126: 4405-4419.
- 719 **Sainsbury F, Lomonossoff GP** (2008). Extremely high-level and rapid transient protein production in  
720 plants without the use of viral replication. *Plant Physiol* 148: 1212-1218.
- 721 **Sainsbury F, Thuenemann EC, Lomonossoff GP** (2009). pEAQ: versatile expression vectors for easy and  
722 quick transient expression of heterologous proteins in plants. *Plant Biotechnol J* 7: 682-693.
- 723 **Scheiba RM, de Opakua AI, Díaz-Quintana A, Cruz-Gallardo I, Martínez-Cruz LA, Martínez-Chantar ML,**  
724 **Blanco FJ, Díaz-Moreno I** (2014). The C-terminal RNA binding motif of HuR is a multi-functional domain  
725 leading to HuR oligomerization and binding to U-rich RNA targets. *RNA Biol* 11: 1250-1261.
- 726 **Schönberger J, Hammes UZ, Dresselhaus T** (2012). In vivo visualization of RNA in plants cells using the  
727  $\lambda$ N22 system and a GATEWAY-compatible vector series for candidate RNAs. *Plant J* 71:173-181.
- 728 **Shahid S, Kim G, Johnson NR, Wafula E, Wang F, Coruh C, Bernal-Galeano V, Phifer T, dePamphilis CW,**  
729 **Westwood JH, Axtell MJ** (2018). MicroRNAs from the parasitic plant *Cuscuta campestris* target host  
730 messenger RNAs. *Nature* 553: 82-85.
- 731 **Shi Y, Gu M, Fan Z, Hong Y** (2008) RNA silencing suppressors: how viruses fight back. *Future Virol* 3: 125-  
732 133.
- 733 **Strack RL, Disney MD, Jaffrey SR** (2013). A superfolding Spinach2 reveals the dynamic nature of  
734 trinucleotide repeat-containing RNA. *Nat Methods* 10: 1219-1224.

- 735 **Tang Y, Wang F, Zhao J, Xie K, Hong Y, Liu Y** (2010). Virus-based microRNA expression for gene  
736 functional analysis in plants. *Plant Physiol* 153: 632-641.
- 737 **Thieme CJ, Rojas-Triana M, Stecyk E, Schudoma C, Zhang W, Yang L, Miñambres M, Walther D, Schulze  
738 WX, Paz-Ares J, Scheible WR, Kragler F** (2015). Endogenous Arabidopsis messenger RNAs transported to  
739 distant tissues. *Nat Plants* 1: 15025.
- 740 **Tutucci E, Livingston NM, Singer RH, Wu B** (2018). Imaging mRNA In Vivo, from Birth to Death. *Annu Rev  
741 Biophys* 47: 85-106.
- 742 **Tyagi S, Kramer FR** (1996). Molecular beacons: probes that fluoresce upon hybridization. *Nat Biotechnol*  
743 14: 303-308.
- 744 **Uddin MN, Kim JY** (2013). Intercellular and Systemic Spread of RNA and RNAi in Plants. *Wiley Interdiscip  
745 Rev RNA* 4: 279-293.
- 746 **van Wezel R, Liu H, Tien P, Stanley J, Hong Y** (2001) Gene C2 of the monopartite geminivirus tomato  
747 yellow leaf curl virus-China encodes a pathogenicity determinant that is localized in the nucleus. *Mol  
748 Plant Microbe Interact* 14: 1125-1128.
- 749 **Wang X, McLachlan J, Zamore PD, Hall TM** (2002). Modular recognition of RNA by a human pumilio-  
750 homology domain. *Cell* 110: 501-512.
- 751 **Warner KD, Chen MC, Song W, Strack RL, Thorn A, Jaffrey SR, Ferré-D'Amaré AR** (2014). Structural  
752 basis for activity of highly efficient RNA mimics of green fluorescent protein. *Nat Struct Mol Biol* 21:658-  
753 663.
- 754 **Warner KD, Sjekloća L, Song W, Filonov GS, Jaffrey SR, Ferré-D'Amaré AR** (2017). A homodimer  
755 interface without base pairs in an RNA mimic of red fluorescent protein. *Nat Chem Biol* 13: 1195-1201.
- 756 **Wydro M, Kozubek E, Lehmann P** (2006). Optimization of transient Agrobacterium-mediated gene  
757 expression system in leaves of *Nicotiana benthamiana*. *Acta Biochim Pol* 53: 289-298.
- 758 **Xoconostle-Cázares B, Xiang Y, Ruiz-Medrano R, Wang HL, Monzer J, Yoo BC, McFarland KC, Franceschi  
759 VR, Lucas WJ** (1999). Plant paralog to viral movement protein that potentiates transport of mRNA into  
760 the phloem. *Science* 283: 94-98.
- 761 **Yamada T, Yoshimura H, Inaguma A, Ozawa T** (2011). Visualization of nonengineered single mRNAs in  
762 living cells using genetically encoded fluorescent probes. *Anal Chem* 83: 5708-5714.
- 763 **Yang HW, Yu TS** (2010). Arabidopsis floral regulators FVE and AGL24 are phloem-mobile RNAs. *Botanical  
764 Studies* 51: 17-26.
- 765 **Yoo BC, Kragler F, Varkonyi-Gasic E, Haywood V, Archer-Evans S, Lee YM, Lough TJ, Lucas WJ** (2004). A  
766 systemic small RNA signaling system in plants. *Plant Cell* 16: 1979-2000.

- 767 **Yoo SD, Cho YH, Sheen J** (2007). Arabidopsis mesophyll protoplasts: a versatile cell system for transient  
768 gene expression analysis. *Nat Protoc* 2: 1565-1572.
- 769 **Yoshida S, Forno DA, Cock JH, Gomez KA** (1976). Laboratory manual for physiological studies of rice, 3rd  
770 edn. Manila, The Philippines: International Rice Research Institute.
- 771 **Yoshimura H, Inaguma A, Yamada T, Ozawa T** (2012). Fluorescent probes for imaging endogenous beta-  
772 actin mRNA in living cells using fluorescent protein-tagged pumilio. *ACS Chem Biol* 7: 999-1005.
- 773 **You M, Jaffrey SR** (2015). Structure and Mechanism of RNA Mimics of Green Fluorescent Protein. *Annu*  
774 *Rev Biophys* 44:187-206.
- 775 **Yu Z, Cho SK, Zhang P, Hong Y, Hannapel DJ** (2020). Utilizing Potato Virus X to Monitor RNA Movement.  
776 RNA Tagging. *Methods in Molecular Biology* , pp:181-194.
- 777 **Yu Z, Dong L, Jiang Z, Yi K, Zhang J, Zhang Z, Zhu Z, Wu Y, Xu M, Ni J** (2018). A semi-dominant mutation  
778 in a CC-NB-LRR-type protein leads to a short-root phenotype in rice. *Rice* 11: 54.
- 779 **Zhang J, Fei J, Leslie BJ, Han KY, Kuhlman TE, Ha T** (2015) Tandem Spinach Array for mRNA Imaging in  
780 Living Bacterial Cells. *Sci Rep* 5: 17295.
- 781 **Zhang X, Lai T, Zhang P, Zhang X, Yuan C, Jin Z, Li H, Yu Z, Qin C, Tör M, Ma P, Cheng Q, Hong Y** (2019)  
782 Mini review: Revisiting mobile RNA silencing in plants. *Plant Sci.* 278: 113-117.
